# Supplementary material for: The epidemic of the multiresistant dermatophyte Trichophyton indotineae has reached China
Source: PubMed Central journal article supplement (PMC9978415; doi:10.3389/fimmu.2022.1113065), 2023-02-16
Supplement: Table_1.pdf [file Table_1.pdf]

**Table S-1. Information of Strains**

| number   | locality          | host  | host nationality | source        | ITS Genotype                  | Depositer    | Genbank accession numbers of ITS |
|----------|-------------------|-------|------------------|---------------|-------------------------------|--------------|----------------------------------|
| JYP18015 |                   |       | China            | face          | <i>T._interdigitale</i> I/II  | Yanpin Jiang | OP961394                         |
| JYP18016 |                   |       | China            | face          | <i>T._interdigitale</i> I/II  | Yanpin Jiang | OP961395                         |
| JYP18027 |                   |       | China            | face          | <i>T._interdigitale</i> I/II  | Yanpin Jiang | OP961396                         |
| JYP20080 |                   |       | China            | fingernail    | <i>T._interdigitale</i> I/II  | Yanpin Jiang | OP961407                         |
| JYP21005 |                   |       | China            | toenail       | <i>T._interdigitale</i> I/II  | Yanpin Jiang | OP961410                         |
| JYP21020 |                   |       | China            | toenail       | <i>T._interdigitale</i> I/II  | Yanpin Jiang | OP961411                         |
| JYP21029 |                   |       | China            | toenail       | <i>T._interdigitale</i> I/II  | Yanpin Jiang | OP961412                         |
| JYP21066 |                   |       | China            | face          | <i>T._interdigitale</i> I/II  | Yanpin Jiang | OP961413                         |
| JYP21070 |                   |       | China            | toenail       | <i>T._interdigitale</i> I/II  | Yanpin Jiang | OP961414                         |
| JYP21071 |                   |       | China            | face          | <i>T._interdigitale</i> I/II  | Yanpin Jiang | OP961415                         |
| JYP21091 |                   |       | China            | head          | <i>T._interdigitale</i> I/II  | Yanpin Jiang | OP961416                         |
| JYP21097 |                   |       | China            | toenail       | <i>T._interdigitale</i> I/II  | Yanpin Jiang | OP961417                         |
| JYP21100 |                   |       | China            | groin, body   | <i>T._interdigitale</i> I/II  | Yanpin Jiang | OP961418                         |
| JYP21117 |                   |       | China            | foot, toenail | <i>T._interdigitale</i> I/II  | Yanpin Jiang | OP961419                         |
| JYP21300 | Guizhou,<br>China | human | China            | toenail       | <i>T._interdigitale</i> I/II  | Yanpin Jiang | OP961420                         |
| JYP22108 |                   |       | China            | toenail       | <i>T._interdigitale</i> I/II  | Yanpin Jiang | OP961422                         |
| JYP18047 |                   |       | China            | face          | <i>T._mentagrophytes</i> IX   | Yanpin Jiang | OP961397                         |
| JYP18100 |                   |       | China            | groin         | <i>T._mentagrophytes</i> IX   | Yanpin Jiang | OP961398                         |
| JYP18108 |                   |       | China            | toenail       | <i>T._mentagrophytes</i> IX   | Yanpin Jiang | OP961399                         |
| JYP18133 |                   |       | China            | unkonwn       | <i>T._mentagrophytes</i> IX   | Yanpin Jiang | OP961400                         |
| JYP18150 |                   |       | China            | head          | <i>T._mentagrophytes</i> IX   | Yanpin Jiang | OP961402                         |
| JYP19047 |                   |       | China            | head          | <i>T._mentagrophytes</i> IX   | Yanpin Jiang | OP961405                         |
| JYP20022 |                   |       | China            | head          | <i>T._mentagrophytes</i> IX   | Yanpin Jiang | OP961406                         |
| JYP2022A |                   |       | China            | pus           | <i>T._mentagrophytes</i> IX   | Yanpin Jiang | OP961408                         |
| JYP2022B |                   |       | China            | hair          | <i>T._mentagrophytes</i> IX   | Yanpin Jiang | OP961409                         |
| JYP22149 |                   |       | China            | toenail       | <i>T._mentagrophytes</i> IX   | Yanpin Jiang | OP961423                         |
| JYP18149 |                   |       | China            | head, body    | <i>T._mentagrophytes</i> VII  | Yanpin Jiang | OP961401                         |
| JYP18152 |                   |       | China            | body          | <i>T._mentagrophytes</i> VII  | Yanpin Jiang | OP961403                         |
| JYP18153 |                   |       | China            | body          | <i>T._mentagrophytes</i> VII  | Yanpin Jiang | OP961404                         |
| JYP18010 |                   |       | India            | groin         | <i>T._mentagrophytes</i> VIII | Yanpin Jiang | OP961393                         |
| JYP22048 |                   |       | India            | face, body    | <i>T._mentagrophytes</i> VIII | Yanpin Jiang | OP961421                         |
